# Supplementary material for: Development of policy performance indicators to assess the implementation of protection from exposure to secondhand smoke in China
Source: HighWire-hosted journal article supplement (doi:10.1136/tobaccocontrol-2012-050890), 2013-06-11
Supplement: tobaccocontrol-2012-050890supp_appendix1.pdf [file tobaccocontrol-2012-050890supp_appendix1.pdf]

## Appendix 1 Set of indicators for evaluating SOTC

### Appendix 1 Set of indicators for evaluating SOTC

| Measurements | Variables                                  | Definition                                                                                                                                    |
|--------------|--------------------------------------------|-----------------------------------------------------------------------------------------------------------------------------------------------|
| SHS Policy   | Tobacco control legislation                | Whether the organization has adopted 100% law or policy prohibiting smoking, which means smoking is completely prohibited indoor environment. |
| Capacities   | Policy advocacy                            | In the last two years, whether relevant provincial departments conducted policy advocacy / promotion of legislation.                          |
|              | Media advocacy                             | In the last two years, whether relevant provincial departments conducted media advocacy for tobacco control.                                  |
|              | Monitoring and evaluation                  | In the last two years, whether relevant provincial departments conducted or took part in tobacco control monitoring.                          |
|              | Plan development                           | In the last two years, whether relevant provincial departments developed local tobacco control work plan.                                     |
|              | Provision of training or technical support | In the last two years, whether relevant provincial departments provided technical support or training on tobacco control.                     |

|                       |                                            |                                                                                                               |
|-----------------------|--------------------------------------------|---------------------------------------------------------------------------------------------------------------|
|                       | Establishment of tobacco control network   | In the last two years, whether relevant provincial departments built tobacco control network.                 |
| Activities            | Cessation service                          | In the last two years, whether relevant provincial departments conducted cessation related work.              |
|                       | Health campaign                            | In the last two years, whether relevant provincial departments conducted health campaign related work.        |
|                       | Prevention of youth initiation             | In the last two years, whether relevant provincial departments undertook prevention of youth initiation.      |
| Quality of activities | Smoke-free environment signage             | Whether smoke-free signage is posted in various places of the organization.<br>Whether ashtrays were present. |
|                       | Dissuasion from smoking                    | Whether staff dissuades smoking.                                                                              |
|                       | Outcome of Creating smoke-free environment | Whether observers can smell cigarette smoke on the premises.                                                  |
|                       |                                            | Whether there are any cigarette buds on the premises.<br>Whether there are people smoking on the premises.    |

Note: The organization included hospitals, schools, government departments, health bureaus, CDC offices or health education institutes, and transport stations in the SOTC survey.
